# Supplementary material for: Level and trends of zero-dose prevalence children in Mozambique: a repeated cross-sectional analysis of three household surveys, 2011-2023
Source: Research Square preprint supplement (doi:10.21203/rs.3.rs-7538237/v1), 2025-10-23
Supplement: Supplementary file 1 [file 3acb01497422fc1a25a091a9.docx]

Supplementary materials

**Additional file 1** - Prevalence of zero-dose in percentage according to Gavi operational definition (ZDGavi)

|  | **Children Zero dose - 12-23 months of age - GAVI** | | | **Children Zero dose - 24-35 months of age - GAVI** | | |
| --- | --- | --- | --- | --- | --- | --- |
| **Characteristic** | **2011** | **2015** | **2022-23** | **2011** | **2015** | **2022-23** |
| **Prev (CI 95%)** | **Prev (CI 95%)** | **Prev (CI 95%)** | **Prev (CI 95%)** | **Prev (CI 95%)** | **Prev (CI 95%)** |
| **Total prevalence** | 9.48 (7.79-11.49) | 10.24 (7.04-14.66) | 24.94 (21.78-28.4) | 7.65 (5.92-9.83) | 13.92 (11.03-17.42) | 26.54 (23.61-29.7) |
| **Mother's education** |  |  |  |  |  |  |
| Illiterate | 12.9 (9.8-16.79) | 13.93 (8.65-21.69) | 33.08 (27.73-38.91) | 12.29 (8.98-16.59) | 23.54 (16.86-31.85) | 34.56 (28.83-40.79) |
| Primary | 8.27 (6.26-10.85) | 10.01 (5.58-17.33) | 27.06 (22.34-32.36) | 5.36 (3.69-7.73) | 10.64 (7.27-15.31) | 28.27 (24.25-32.68) |
| Secondary/above | 5.15 (2.97-8.79) | 4.21 (1.38-12.16) | 9.3 (6.13-13.87) | 3.26 (1.61-6.49) | 8.5 (4.51-15.44) | 10.39 (7.65-13.96) |
| **Area of residence** |  |  |  |  |  |  |
| Urban | 4.13 (2.66-6.36) | 4.62 (2.37-8.84) | 9.02 (6.45-12.47) | 3.59 (2.16-5.9) | 8.91 (5.13-15.04) | 14.3 (10.99-18.41) |
| Rural | 11.47 (9.25-14.14) | 12.14 (8.04-17.93) | 30.88 (26.79-35.3) | 9.27 (6.97-12.23) | 15.6 (12.02-19.99) | 31.67 (27.92-35.67) |
| **Region** |  |  |  |  |  |  |
| Southern | 3.06 (1.79-5.18) | 2.55 (1.12-5.72) | 3.9 (2.3-6.54) | 2.69 (1.64-4.39) | 5.91 (3.44-9.97) | 9.01 (5.8-13.72) |
| Central | 12.37 (9.62-15.76) | 15.64 (11.42-21.07) | 34.92 (29.62-40.61) | 11.4 (8.16-15.69) | 19.55 (14.59-25.69) | 34.03 (29.15-39.29) |
| Northern | 8.62 (5.94-12.36) | 8.61 (3.22-21.07) | 21.81 (17.31-27.1) | 5.44 (3.47-8.43) | 11.99 (7.3-19.07) | 24.77 (20.57-29.51) |
| **Province** |  |  |  |  |  |  |
| Niassa | 9.59 (5.02-17.54) | 4.13 (1.02-15.32) | 17.85 (12.1-25.56) | 11.18 (5.67-20.85) | 4.29 (1.81-9.8) | 12.33 (7.07-20.62) |
| Cabo Delgado | 5.55 (2.27-12.98) | 0 | 18.62 (12.56-26.72) | 3.48 (1.32-8.88) | 9.33 (3.51-22.52) | 18.4 (13-25.38) |
| Nampula | 9.99 (5.9-16.41) | 13.1 (4.46-32.74) | 24.04 (17.42-32.2) | 4.11 (1.85-8.9) | 16.21 (8.7-28.2) | 30.41 (24.32-37.27) |
| Zambézia | 18.21 (12.88-25.12) | 18.11 (10.52-29.38) | 55.3 (44.95-65.22) | 20.54 (12.94-31.01) | 29.1 (17.77-43.81) | 49.31 (40.59-58.07) |
| Tete | 11.6 (6.47-19.92) | 25.27 (13.3-42.7) | 27.87 (19.64-37.93) | 9.74 (4.93-18.31) | 22.34 (12.28-37.15) | 31.99 (20.91-45.57) |
| Manica | 6.28 (3.48-11.09) | 4.04 (0.92-16.02) | 12.66 (7.48-20.62) | 4.35 (1.97-9.31) | 7.88 (3.34-17.5) | 17.21 (11.05-25.8) |
| Sofala | 4.87 (2.54-9.11) | 13.11 (8.35-19.99) | 11.2 (7.09-17.24) | 2.61 (1.07-6.23) | 14.2 (7.81-24.44) | 11.34 (7.76-16.29) |
| Inhambane | 2.61 (0.84-7.78) | 4.9 (1.48-15.02) | 4.59 (1.88-10.78) | 2.54 (1.05-6.04) | 4.55 (1.12-16.73) | 9.05 (4.58-17.13) |
| Gaza | 7.39 (3.76-14.01) | 1.65 (0.34-7.5) | 2.32 (0.81-6.44) | 3.08 (1.18-7.78) | 4.14 (1.58-10.4) | 0.72 (0.1-5.14) |
| Maputo Provincia | 0 | 0 | 5.04 (1.81-13.29) | 0.48 (0.06-3.49) | 6.3 (1.77-20.05) | 13.18 (7.29-22.67) |
| Cidade de Maputo | 1.75 (0.53-5.56) | 3.86 (0.95-14.41) | 3.45 (1.11-10.21) | 6.15 (2.74-13.25) | 11.89 (4.55-27.65) | 10.3 (5.09-19.76) |
| **Wealth index** |  |  |  |  |  |  |
| Poorest | 17.18 (12.84-22.61) | 19.75 (13.23-28.43) | 41.97 (35.1-49.17) | 12.32 (8.26-17.99) | 26.03 (17.37-37.07) | 44.01 (37.28-50.96) |
| Poorer | 10.58 (7.83-14.15) | 13.37 (7.07-23.84) | 34.54 (27.02-42.92) | 8.89 (5.92-13.15) | 12.96 (8.83-18.62) | 33.52 (26.22-41.7) |
| Middle | 8.78 (5.75-13.19) | 5.36 (2.9-9.69) | 20.3 (14.79-27.22) | 9.19 (5.88-14.09) | 12.14 (7.47-19.12) | 19.26 (14.42-25.25) |
| Richer | 4.23 (2.39-7.39) | 4.54 (1.82-10.89) | 9.74 (6.61-14.12) | 2.98 (1.58-5.54) | 8.41 (3.74-17.82) | 12.5 (8.38-18.24) |
| Richest | 3.7 (2.2-6.17) | 2.74 (1.14-6.43) | 5.28 (3.16-8.71) | 4.28 (2.49-7.28) | 7.9 (4.31-14.02) | 11.11 (7.65-15.87) |
| **Has a health card** |  |  |  |  |  |  |
| No card | 41.03 (32.83-49.76) | 57.5 (43.28-70.58) | 57.32 (50.54-63.83) | 30.46 (22.79-39.39) | 47.11 (34.51-60.09) | 54.63 (49.75-59.41) |
| Yes seen | 4.95 (3.63-6.7) | 2.77 (1.24-6.07) | 8.66 (6.67-11.16) | 2.26 (1.53-3.31) | 3.22 (1.69-6.05) | 5.26 (3.73-7.37) |
| Yes not seen | 15.46 (9.68-23.78) | 19.08 (12.32-28.36) | 51.42 (30.28-72.07) | 12 (7.37-18.93) | 26.87 (20.39-34.52) | 37.59 (21.2-57.41) |
|  |  |  |  |  |  |  |

**Additional file 2** – Time multiplicative changes in zero-dose prevalence using the Gavi operational definition

| **Characteristic** | **12-23 months of age** | | **24-35 months of age** | |
| --- | --- | --- | --- | --- |
| **2015 vs 2011** | **2022/23 vs 2015** | **2015 vs 2011** | **2022/23 vs 2015** |
| **PR (95% CI)** | **PR (95% CI)** | **PR (95% CI)** | **PR (95% CI)** |
| **Total** | 1.08 (0.88 - 1.33), 0.716 | 2.44 (2.01 - 2.96), p < 0.001 | 1.82 (1.54 - 2.16), 0.001 | 1.91 (1.68 - 2.17), p < 0.001 |
| **Area of residence** |  |  |  |  |
| Rural | 1.06 (0.84 - 1.33), 0.806 | 2.54 (2.06 - 3.14), p < 0.001 | 1.68 (1.39 - 2.03), 0.007 | 2.03 (1.76 - 2.34), p < 0.001 |
| Urban | 1.12 (0.75 - 1.66), 0.782 | 1.95 (1.35 - 2.82), 0.077 | 2.48 (1.72 - 3.58), 0.016 | 1.61 (1.19 - 2.16), 0.121 |
| **Province** |  |  |  |  |
| Niassa | 0.43 (0.20 - 0.92), 0.279 | 4.32 (2.11 - 8.84), 0.046 | 0.38 (0.22 - 0.65), 0.081 | 2.88 (1.74 - 4.75), 0.040 |
| Cabo Delgado |  |  | 2.68 (1.37 - 5.24), 0.153 | 1.97 (1.20 - 3.25), 0.184 |
| Nampula | 1.31 (0.74 - 2.31), 0.642 | 1.84 (1.08 - 3.11), 0.262 | 3.94 (2.41 - 6.45), 0.007 | 1.88 (1.37 - 2.57), 0.050 |
| Zambézia | 0.99 (0.73 - 1.35), 0.986 | 3.05 (2.32 - 4.01), p < 0.001 | 1.42 (1.04 - 1.94), 0.278 | 1.69 (1.33 - 2.16), 0.034 |
| Tete | 2.18 (1.45 - 3.27), 0.061 | 1.10 (0.79 - 1.54), 0.776 | 2.29 (1.49 - 3.53), 0.060 | 1.43 (1.02 - 2.01), 0.301 |
| Manica | 0.64 (0.29 - 1.41), 0.583 | 3.13 (1.45 - 6.78), 0.149 | 1.81 (1.03 - 3.21), 0.309 | 2.18 (1.37 - 3.48), 0.104 |
| Sofala | 2.69 (1.83 - 3.97), 0.012 | 0.85 (0.63 - 1.17), 0.621 | 5.45 (3.22 - 9.22), 0.002 | 0.80 (0.57 - 1.12), 0.520 |
| Inhambane | 1.88 (0.84 - 4.24), 0.448 | 0.94 (0.45 - 1.95), 0.930 | 1.79 (0.79 - 4.06), 0.486 | 1.99 (0.93 - 4.27), 0.381 |
| Gaza | 0.22 (0.10 - 0.52), 0.085 | 1.41 (0.55 - 3.61), 0.720 | 1.34 (0.69 - 2.63), 0.667 | 0.17 (0.06 - 0.53), 0.128 |
| Maputo Provincia |  |  | 13.21 (4.01 - 43.54), 0.035 | 2.09 (1.06 - 4.13), 0.290 |
| Cidade de Maputo | 2.21 (0.89 - 5.50), 0.395 | 0.89 (0.37 - 2.18), 0.902 | 1.93 (1.06 - 3.54), 0.287 | 0.87 (0.49 - 1.53), 0.806 |
| **Mother's education** |  |  |  |  |
| Illiterate | 1.08 (0.83 - 1.41), 0.777 | 2.37 (1.86 - 3.03), 0.001 | 1.92 (1.54 - 2.39), 0.004 | 1.47 (1.23 - 1.76), 0.038 |
| Primary | 1.21 (0.88 - 1.66), 0.554 | 2.70 (2.01 - 3.64), 0.001 | 1.98 (1.53 - 2.58), 0.011 | 2.66 (2.18 - 3.25), p < 0.001 |
| Secondary/above | 0.82 (0.44 - 1.51), 0.750 | 2.21 (1.23 - 3.97), 0.188 | 2.61 (1.64 - 4.15), 0.045 | 1.22 (0.87 - 1.72), 0.567 |
| **Wealth Index** |  |  |  |  |
| Poorest | 1.15 (0.91 - 1.46), 0.567 | 2.13 (1.73 - 2.62), p < 0.001 | 2.11 (1.61 - 2.77), 0.007 | 1.69 (1.38 - 2.07), 0.012 |
| Poorer | 1.26 (0.90 - 1.77), 0.500 | 2.58 (1.87 - 3.58), 0.004 | 1.46 (1.11 - 1.91), 0.178 | 2.59 (2.08 - 3.22), p < 0.001 |
| Middle | 0.61 (0.42 - 0.88), 0.189 | 3.79 (2.70 - 5.31), p < 0.001 | 1.32 (0.96 - 1.82), 0.398 | 1.59 (1.21 - 2.08), 0.099 |
| Richer | 1.07 (0.63 - 1.82), 0.899 | 2.15 (1.32 - 3.50), 0.128 | 2.82 (1.71 - 4.67), 0.044 | 1.49 (0.96 - 2.30), 0.378 |
| Richest | 0.74 (0.45 - 1.22), 0.559 | 1.93 (1.17 - 3.19), 0.202 | 1.84 (1.24 - 2.75), 0.135 | 1.41 (1.00 - 1.99), 0.337 |
| **Place of delivery** |  |  |  |  |
| At home/Other | 1.22 (0.93 - 1.62), 0.477 | 2.38 (1.83 - 3.08), 0.001 | 2.09 (1.71 - 2.57), p < 0.001 | 1.65 (1.41 - 1.94), 0.002 |
| Institutional | 1.35 (1.06 - 1.73), 0.229 | 2.26 (1.82 - 2.82), p < 0.001 | 2.66 (2.02 - 3.51), 0.001 | 1.71 (1.39 - 2.11), 0.012 |
| **Has a health card** |  |  |  |  |
| No card | 1.40 (1.20 - 1.64), 0.038 | 1.00 (0.87 - 1.14), 0.982 | 1.55 (1.27 - 1.88), 0.028 | 1.16 (1.00 - 1.34), 0.317 |
| Yes seen | 0.56 (0.37 - 0.86), 0.184 | 3.12 (2.06 - 4.74), 0.008 | 1.43 (0.98 - 2.07), 0.351 | 1.63 (1.14 - 2.34), 0.185 |
| Yes, not seen | 1.23 (0.91 - 1.68), 0.502 | 2.70 (2.00 - 3.63), 0.001 | 2.24 (1.71 - 2.93), 0.004 | 1.40 (1.06 - 1.85), 0.243 |
|  |  |  |  |  |

PR – prevalence ratio

95% CI – 95% confidence interval

* The prevalence ratio is the division of prevalence in 2022/23 by the prevalence in 2015. The confidence intervals are computed through the delta method from the variances of the two prevalence proportions.

**Additional file 3** - unadjusted log-binomial regressions

|  | **WHO definition** | | | | | **Gavi definition** | | | | | | |
| --- | --- | --- | --- | --- | --- | --- | --- | --- | --- | --- | --- | --- |
| **Characteristic** | **12-23** | | | **24-35** | | **12-23** | | | | **24-35** | | |
| **PR (95% CI)*** | **p-value** | **PR (95% CI) *** | | **p-value** | | **PR (95% CI) *** | **p-value** | **PR (95% CI) *** | | **p-value** |
| **Total of children enrolled** | 1807 |  | 1950 | |  | | 1807 |  | 1950 | |  |
| **Mother's age** |  |  |  | |  | |  |  |  | |  |
| 15-24 | 1.00 |  | 1.00 | |  | | 1.00 |  | 1.00 | |  |
| 25-34 | 0.83 (0.54-1.26) | 0.374 | 0.72 (0.51-1.02) | | 0.064 | | 0.81 (0.63-1.04) | 0.105 | 0.93 (0.69-1.25) | | 0.617 |
| ≥35 | 1.41 (0.98-2.03) | 0.062 | 0.87 (0.57-1.33) | | 0.514 | | 0.80 (0.56-1.14) | 0.221 | 1.12 (0.83-1.52) | | 0.461 |
| **Mother's education** |  |  |  | |  | |  |  |  | |  |
| Illiterate | 1.00 |  | 1.00 | |  | | 1.00 |  | 1.00 | |  |
| Primary | 0.58 (0.42-0.8) | 0.001 | 0.58 (0.44-0.76) | | <0.001 | | 0.82 (0.66-1.01) | 0.066 | 0.82 (0.64-1.05) | | 0.116 |
| Secondary/above | 0.24 (0.12-0.45) | <0.001 | 0.11 (0.06-0.2) | | <0.001 | | 0.3 (0.21-0.43) | <0.001 | 0.28 (0.18-0.43) | | <0.001 |
| **Mother's marital status** |  |  |  | |  | |  |  |  | |  |
| Single/Never in union | 1.00 |  | 1.00 | |  | | 1.00 |  | 1.00 | |  |
| Single/Never in union | 0.88 (0.32-2.46) | 0.809 | 0.8 (0.39-1.66) | | 0.551 | | 0.81 (0.47-1.41) | 0.46 | 0.95 (0.52-1.71) | | 0.853 |
| Divorced/Separated/Widowed | 1.18 (0.7-1.98) | 0.537 | 0.82 (0.52-1.31) | | 0.408 | | 1.06 (0.78-1.44) | 0.715 | 1.07 (0.73-1.55) | | 0.739 |
| **Mother's occupation** |  |  |  | |  | |  |  |  | |  |
| Unemployed | 1.00 |  | 1.00 | |  | | 1.00 |  | 1.00 | |  |
| Employed | 0.54 (0.33-0.88) | 0.014 | 0.56 (0.39-0.8) | | 0.002 | | 0.71 (0.54-0.92) | 0.01 | 0.73 (0.54-1) | | 0.047 |
| **Area of residence** |  |  |  | |  | |  |  |  | |  |
| Rural | 1.00 |  | 1.00 | |  | | 1.00 |  | 1.00 | |  |
| Urban | 0.17 (0.1-0.31) | <0.001 | 0.24 (0.15-0.37) | | <0.001 | | 0.45 (0.34-0.6) | <0.001 | 0.29 (0.2-0.42) | | <0.001 |
| **Region** |  |  |  | |  | |  |  |  | |  |
| Southern | 1.00 |  | 1.00 | |  | | 1.00 |  | 1.00 | |  |
| Central | 23.62 (7.81-71.39) | <0.001 | 6.2 (3.01-12.78) | | <0.001 | | 3.78 (2.4-5.95) | <0.001 | 8.96 (5.2-15.44) | | <0.001 |
| Northern | 11.07 (3.58-34.28) | <0.001 | 3.47 (1.66-7.27) | | 0.001 | | 2.75 (1.73-4.38) | <0.001 | 5.6 (3.17-9.87) | | <0.001 |
| **Wealth index** |  |  |  | |  | |  |  |  | |  |
| Poorest | 1.00 |  | 1.00 | |  | | 1.00 |  | 1.00 | |  |
| Poorer | 0.62 (0.4-0.95) | 0.03 | 0.63 (0.43-0.93) | | 0.021 | | 0.76 (0.57-1.01) | 0.061 | 0.82 (0.62-1.08) | | 0.166 |
| Middle | 0.41 (0.25-0.66) | <0.001 | 0.34 (0.22-0.54) | | <0.001 | | 0.44 (0.32-0.61) | <0.001 | 0.48 (0.33-0.7) | | <0.001 |
| Richer | 0.14 (0.07-0.27) | <0.001 | 0.18 (0.1-0.32) | | <0.001 | | 0.28 (0.19-0.43) | <0.001 | 0.23 (0.15-0.35) | | <0.001 |
| Richest | 0.07 (0.03-0.17) | <0.001 | 0.14 (0.07-0.27) | | <0.001 | | 0.25 (0.17-0.38) | <0.001 | 0.13 (0.07-0.21) | | <0.001 |
| **Religion** |  |  |  | |  | |  |  |  | |  |
| Protestants |  |  |  | |  | |  |  |  | |  |
| Protestants |  |  |  | |  | |  |  |  | |  |
| Islamic |  |  |  | |  | |  |  |  | |  |
| Others |  |  |  | |  | |  |  |  | |  |
| **Antenatal visits** |  |  |  | |  | |  |  |  | |  |
| 1 to 2 | 1.00 |  | 1.00 | |  | | 1.00 |  | 1.00 | |  |
| 1 to 3 | 0.16 (0.1-0.27) | <0.001 | 0.22 (0.15-0.31) | | <0.001 | | 0.31 (0.24-0.41) | <0.001 | 0.3 (0.22-0.41) | | <0.001 |
| ≥4 | 0.08 (0.05-0.13) | <0.001 | 0.1 (0.07-0.16) | | <0.001 | | 0.18 (0.13-0.24) | <0.001 | 0.17 (0.12-0.24) | | <0.001 |
| **Place of delivery** |  |  |  | |  | |  |  |  | |  |
| At home/Other | 1.00 |  | 1.00 | |  | | 1.00 |  | 1.00 | |  |
| Institutional | 0.12 (0.08-0.18) | <0.001 | 0.2 (0.14-0.29) | | <0.001 | | 0.35 (0.28-0.42) | <0.001 | 0.31 (0.24-0.4) | | <0.001 |
| **Sex of child** |  |  |  | |  | |  |  |  | |  |
| Famale | 1.00 |  | 1.00 | |  | | 1.00 |  | 1.00 | |  |
| Male | 1.07 (0.73-1.57) | 0.725 | 1.16 (0.85-1.58) | | 0.356 | | 1.1 (0.89-1.36) | 0.368 | 0.89 (0.69-1.15) | | 0.384 |
| **Birth order** |  |  |  | |  | |  |  |  | |  |
| 1 | 1.00 |  | 1.00 | |  | | 1.00 |  | 1.00 | |  |
| 2 to 3 | 1.39 (0.89-2.15) | 0.147 | 1.12 (0.71-1.78) | | 0.619 | | 1.32 (0.98-1.78) | 0.071 | 1.59 (1.13-2.23) | | 0.008 |
| ≥4 | 1.11 (0.67-1.85) | 0.677 | 0.93 (0.59-1.44) | | 0.732 | | 1.01 (0.74-1.38) | >0.9 | 1.4 (0.99-1.99) | | 0.058 |
| **Number of household members** |  |  |  | |  | |  |  |  | |  |
| 1 to 2 | 1.00 |  | 1.00 | |  | | 1.00 |  | 1.00 | |  |
| 3 to 4 | 1.06 (0.19-5.91) | >0.9 | 1.72 (0.35-8.45) | | 0.503 | | 0.68 (0.37-1.24) | 0.206 | 0.81 (0.33-2) | | 0.649 |
| ≥5 | 0.82 (0.15-4.54) | 0.823 | 1.5 (0.31-7.22) | | 0.613 | | 0.61 (0.33-1.11) | 0.105 | 0.7 (0.29-1.71) | | 0.439 |
| **Number of children under 5 in the household** |  |  |  | |  | |  |  |  | |  |
| 0 | 1.00 |  | 1.00 | |  | | 1.00 |  | 1.00 | |  |
| 1 to 2 | 1.32 (0.34-5.1) | 0.687 | 3.3 (0.88-12.41) | | 0.078 | | 0.9 (0.44-1.82) | 0.765 | 1.42 (0.55-3.67) | | 0.473 |
| ≥3 | 1.39 (0.35-5.52) | 0.638 | 4.17 (1.06-16.32) | | 0.041 | | 1.07 (0.51-2.26) | 0.857 | 1.56 (0.58-4.2) | | 0.374 |
| **Has a health card** |  |  |  | |  | |  |  |  | |  |
| No card | 1.00 |  | 1.00 | |  | | 1.00 |  | 1.00 | |  |
| Yes seen | 0.03 (0.01-0.07) | <0.001 | 0.03 (0.01-0.06) | | <0.001 | | 0.1 (0.07-0.14) | <0.001 | 0.15 (0.12-0.2) | | <0.001 |
| Yes not seen | 0.36 (0.1-1.37) | 0.135 | 0.22 (0.09-0.55) | | 0.001 | | 0.69 (0.42-1.12) | 0.136 | 0.9 (0.58-1.38) | | 0.619 |
| **Province**** |  |  |  | |  | |  |  |  | |  |
| Sofala | 1.00 |  | 1.00 | |  | | 1.00 |  | 1.00 | |  |
| Cabo Delgado | 2.53 (1.03 – 6.25) | 0.044 | 1.44 (0.65 – 3.19) | | 0.367 | | 1.59 (0.90 – 2.82) | 0.108 | 1.09 (0.57 – 2.06) | | 0.798 |
| Niassa | 2.63 (1.12 – 6.19) | 0.026 | 2.39 (1.27 – 4.50) | | 0.007 | | 1.66 (0.94 – 2.95) | 0.081 | 1.62 (0.99 – 2.65) | | 0.053 |
| Cabo Delgado | 3.05 (1.29 – 7.21) | 0.011 | 2.34 (1.23 – 4.42) | | 0.009 | | 2.15 (1.26 – 3.65) | 0.005 | 2.68 (1.76 – 4.08) | | <0.001 |
| Nampula | 9.81 (4.47 – 21.52) | <0.001 | 5.69 (3.15 – 10.30) | | <0.001 | | 4.94 (3.08 – 7.92) | <0.001 | 4.35 (2.91 – 6.51) | | <0.001 |
| Zambézia | 5.75 (2.56 – 12.92) | <0.001 | 4.32 (2.18 – 8.55) | | <0.001 | | 2.49 (1.45 – 4.29) | 0.001 | 2.82 (1.66 – 4.79) | | <0.001 |
| Tete | 1.65 (0.61 – 4.45) | 0.318 | 0.98 (0.38 – 2.54) | | 0.965 | | 1.13 (0.58 – 2.19) | 0.716 | 1.52 (0.87 – 2.64) | | 0.139 |
| Manica | 0.46 (0.10 – 2.20) | 0.332 | 0.57 (0.19 – 1.75) | | 0.326 | | 0.41 (0.16 – 1.07) | 0.069 | 0.80 (0.38 – 1.67) | | 0.55 |
| Inhambane | 0.14 (0.02 – 1.15) | 0.067 | 0.00 (0.00 – 0.00) | | <0.001 | | 0.21 (0.07 – 0.62) | 0.005 | 0.06 (0.01 – 0.46) | | 0.006 |
| Gaza | 0.36 (0.04 – 2.97) | 0.339 | 1.08 (0.42 – 2.80) | | 0.869 | | 0.45 (0.15 – 1.31) | 0.144 | 1.16 (0.60 – 2.26) | | 0.657 |
| Cidade de Maputo | - | - | 0.36 (0.05 – 2.64) | | 0.315 | | 0.31 (0.10 – 0.99) | 0.048 | 0.91 (0.43 – 1.93) | | 0.803 |
|  |  |  |  | |  | |  |  |  | |  |

PR – prevalence ratio

95% CI – 95% confidence interval

* The prevalence ratios are estimated through log-binomial regression. All listed covariates except place of delivery are included in the model.

** Sofala was chosen as a reference because the typical reference (Maputo City) has sparse data, and Sofala harbors the second largest city (after Maputo City) in the country.

**Additional file 4** - Factors associated with the prevalence of zero-dose (Gavi definition)

| **Characteristic** | **12-23** | | | | | **24-35** | | | | |
| --- | --- | --- | --- | --- | --- | --- | --- | --- | --- | --- |
| **PR (95% CI)** | **p-value** | **PR (95% CI)** | **p-value** | **PR (95% CI)** | | **p-value** | **PR (95% CI)** | **p-value** |
| Total observations | 1727 |  | 1727 |  | 1789 | |  | 1789 |  |
| Mother Age |  |  |  |  |  | |  |  |  |
| 15-24 | 1.00 |  | 1.00 |  | 1.00 | |  | 1.00 |  |
| 25-34 | 0.94 (0.70 – 1.26) | 0.662 | 1.00 (0.97 – 1.03) | 0.923 | 0.89 (0.70 – 1.13) | | 0.338 | 0.96 (0.78 – 1.18) | 0.708 |
| ≥35 | 1.07 (0.80 – 1.42) | 0.646 | 0.91 (0.74 – 1.11) | 0.344 | 0.92 (0.66 – 1.27) | | 0.602 | 1.00 (0.76 – 1.33) | 0.984 |
| Mother Religion |  |  |  |  |  | |  |  |  |
| Catholic | 1.00 |  | 1.00 |  | 1.00 | |  | 1.00 |  |
| Islamic | 0.68 (0.50 – 0.93) | 0.015 | 0.62 (0.47 – 0.82) | 0.001 | 0.96 (0.70 – 1.32) | | 0.801 | 0.96 (0.72 – 1.29) | 0.779 |
| Zion | 1.04 (0.73 – 1.50) | 0.813 | 0.95 (0.72 – 1.24) | 0.694 | 1.14 (0.81 – 1.60) | | 0.466 | 1.19 (0.89 – 1.60) | 0.242 |
| Protestant | 0.95 (0.69 – 1.32) | 0.777 | 0.84 (0.62 – 1.14) | 0.270 | 1.00 (0.70 – 1.43) | | 0.991 | 1.00 (0.73 – 1.38) | 0.989 |
| Other | 0.88 (0.66 – 1.18) | 0.398 | 0.89 (0.78 – 1.02) | 0.099 | 1.00 (0.66 – 1.51) | | 0.988 | 0.97 (0.63 – 1.50) | 0.894 |
| Household Province** |  |  |  |  |  | |  |  |  |
| Sofala | 1.00 |  | 1.00 |  | 1.00 | |  | 1.00 |  |
| Niassa | 1.58 (0.87 – 2.88) | 0.130 | 1.64 (0.95 – 2.82) | 0.076 | 1.05 (0.51 – 2.14) | | 0.897 | 1.13 (0.56 – 2.25) | 0.739 |
| Cabo Delgado | 1.73 (0.96 – 3.12) | 0.070 | 1.43 (0.82 – 2.47) | 0.207 | 1.56 (0.89 – 2.76) | | 0.123 | 1.39 (0.79 – 2.45) | 0.257 |
| Nampula | 1.99 (1.13 – 3.53) | 0.018 | 1.72 (1.01 – 2.90) | 0.044 | 2.45 (1.52 – 3.95) | | <0.001 | 2.22 (1.38 – 3.56) | 0.001 |
| Zambézia | 3.74 (2.29 – 6.09) | <0.001 | 3.18 (2.01 – 5.04) | <0.001 | 3.61 (2.40 – 5.42) | | <0.001 | 3.33 (2.22 – 4.99) | <0.001 |
| Tete | 2.18 (1.29 – 3.70) | 0.004 | 1.96 (1.17 – 3.27) | 0.010 | 2.60 (1.59 – 4.24) | | <0.001 | 2.59 (1.65 – 4.08) | <0.001 |
| Manica | 1.19 (0.61 – 2.32) | 0.601 | 1.13 (0.60 – 2.14) | 0.698 | 1.64 (0.96 – 2.80) | | 0.069 | 1.52 (0.90 – 2.58) | 0.119 |
| Inhambane | 0.46 (0.17 – 1.27) | 0.133 | 0.47 (0.19 – 1.21) | 0.117 | 1.00 (0.47 – 2.15) | | 0.997 | 0.98 (0.46 – 2.08) | 0.952 |
| Gaza | 0.27 (0.09 – 0.83) | 0.022 | 0.31 (0.12 – 0.83) | 0.019 | 0.09 (0.01 – 0.63) | | 0.016 | 0.09 (0.01 – 0.65) | 0.017 |
| Maputo Provincia | 0.80 (0.28 – 2.32) | 0.685 | 0.85 (0.32 – 2.30) | 0.751 | 1.92 (0.89 – 4.15) | | 0.097 | 1.84 (0.87 – 3.88) | 0.112 |
| Maputo Cidade | 0.81 (0.23 – 2.87) | 0.741 | 0.74 (0.23 – 2.38) | 0.612 | 1.81 (0.75 – 4.35) | | 0.187 | 1.75 (0.74 – 4.15) | 0.200 |
| Area of residence |  |  |  |  |  | |  |  |  |
| Rural | 1.00 |  | 1.00 |  | 1.00 | |  | 1.00 |  |
| Urban | 0.74 (0.48 – 1.16) | 0.187 | 0.76 (0.47 – 1.21) | 0.246 | 0.82 (0.57 – 1.19) | | 0.303 | 0.85 (0.60 – 1.22) | 0.376 |
| Household wealth quintile |  |  |  |  |  | |  |  |  |
| 1st | 1.00 |  | 1.00 |  | 1.00 | |  | 1.00 |  |
| 2nd | 0.87 (0.67 – 1.14) | 0.322 | 0.89 (0.74 – 1.06) | 0.192 | 0.79 (0.60 – 1.04) | | 0.097 | 0.85 (0.66 – 1.10) | 0.212 |
| 3rd | 0.73 (0.49 – 1.10) | 0.135 | 0.86 (0.69 – 1.09) | 0.217 | 0.60 (0.42 – 0.85) | | 0.004 | 0.69 (0.51 – 0.94) | 0.019 |
| 4th | 0.42 (0.26 – 0.68) | <0.001 | 0.57 (0.36 – 0.91) | 0.019 | 0.50 (0.31 – 0.82) | | 0.006 | 0.66 (0.41 – 1.06) | 0.082 |
| 5th | 0.35 (0.17 – 0.72) | 0.004 | 0.52 (0.27 – 1.00) | 0.050 | 0.58 (0.29 – 1.15) | | 0.119 | 0.73 (0.38 – 1.43) | 0.363 |
| Mother's Education Level |  |  |  |  |  | |  |  |  |
| Illiteracy | 1.00 |  | 1.00 |  | 1.00 | |  | 1.00 |  |
| Primary | 1.00 (0.80 – 1.26) | 0.980 | 0.95 (0.87 – 1.04) | 0.306 | 0.94 (0.78 – 1.15) | | 0.558 | 0.98 (0.82 – 1.17) | 0.838 |
| Secondary | 0.87 (0.55 – 1.36) | 0.535 | 0.91 (0.66 – 1.25) | 0.55 | 0.57 (0.39 – 0.84) | | 0.004 | 0.65 (0.43 – 1.00) | 0.049 |
| Place of delivery |  |  |  |  |  | |  |  |  |
| Home or other | - |  | 1.00 |  | - | |  | 1.00 |  |
| Institution | - |  | 0.49 (0.38 – 0.62) | <0.001 | - | |  | 0.51 (0.41 – 0.64) | <0.001 |
|  |  |  |  |  |  | |  |  |  |
